# Supplementary material for: Hormone replacement therapy decreases the risk of tinnitus in menopausal women: a nationwide study
Source: PubMed Central journal article supplement (PMC5929427; doi:10.18632/oncotarget.24452), 2018-02-08
Supplement: oncotarget-09-19807-s001.pdf [file oncotarget-09-19807-s001.pdf]

## **Hormone replacement therapy decreases the risk of tinnitus in menopausal women: a nationwide study**

### **SUPPLEMENTARY MATERIALS**

**Supplementary Table 1: Characteristics of the study participants at the end of follow-up.** See [Supplementary\\_Table\\_1](#)
